# Supplementary material for: Three 3D silver-bis(triazole) metal–organic frameworks stabilized by high-connected Wells–Dawson polyoxometallates
Source: Royal Society of Chemistry journal article supplement (doi:10.1039/c3dt53437e), 2014-01-01
Supplement: c3dt53437e.pdf [file c3dt53437e.pdf]

## Three 3D Silver-bis(triazole) Metal-organic Frameworks

### Stabilized by High-connected Wells-Dawson

#### Polyoxometallate

Xiuli Wang,\* Dan Zhao, Aixiang Tian and Jun Ying

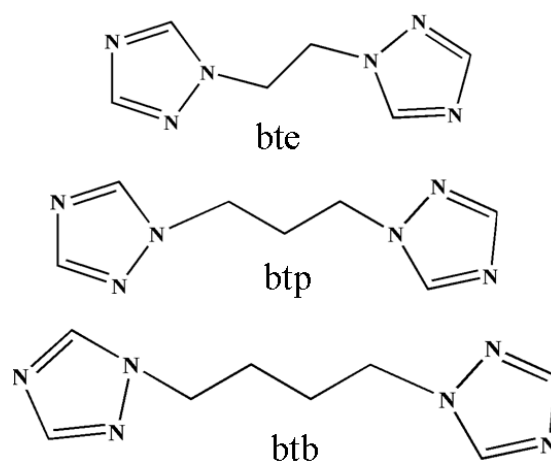

**Chart S1.** The organic ligands 1,2-bis(1,2,4-triazol-1-yl)ethane (bte), 1,3-bis(1,2,4-triazol-1-yl)propane (btp) and 1,4-bis(1,2,4-triazol-1-yl)butane (btb) used in compounds 1–3.

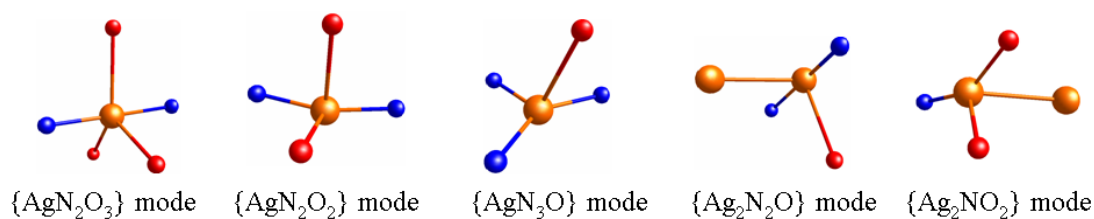

**Figure S1.** Five coordination modes of Ag<sup>I</sup> ions in compound 1.

Supplementary Material (ESI) for Dalton Transactions  
This journal is © The Royal Society of Chemistry

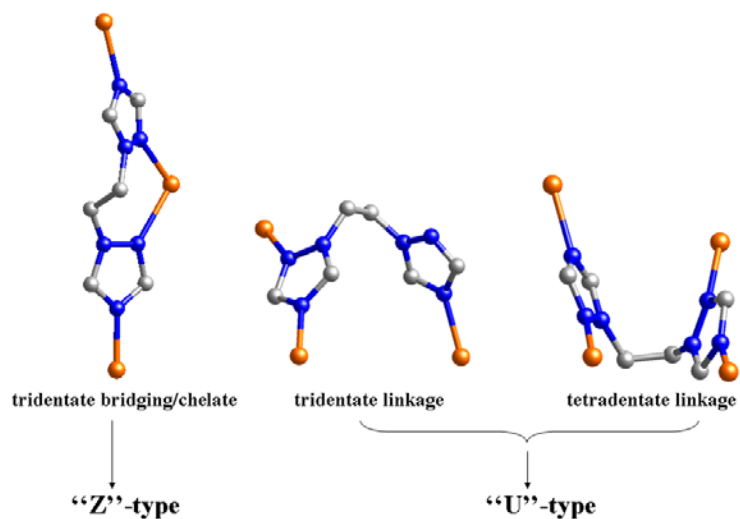

Figure S2. The conformation and coordination modes of bte in compound **1**.

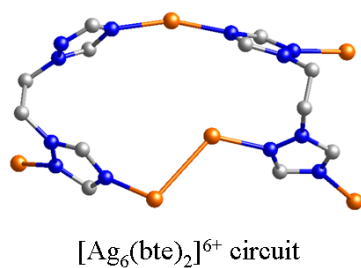

Figure S3. The  $[\text{Ag}_6(\text{bte})_2]^{6+}$  circuit in compound **1**.

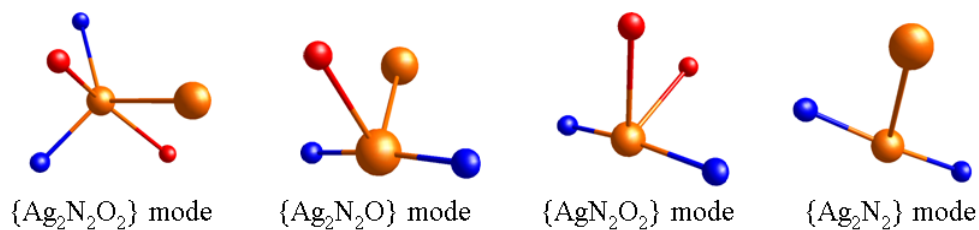

Figure S4. Four coordination modes of  $\text{Ag}^{\text{I}}$  ions in compound **2**.

Supplementary Material (ESI) for Dalton Transactions  
This journal is © The Royal Society of Chemistry

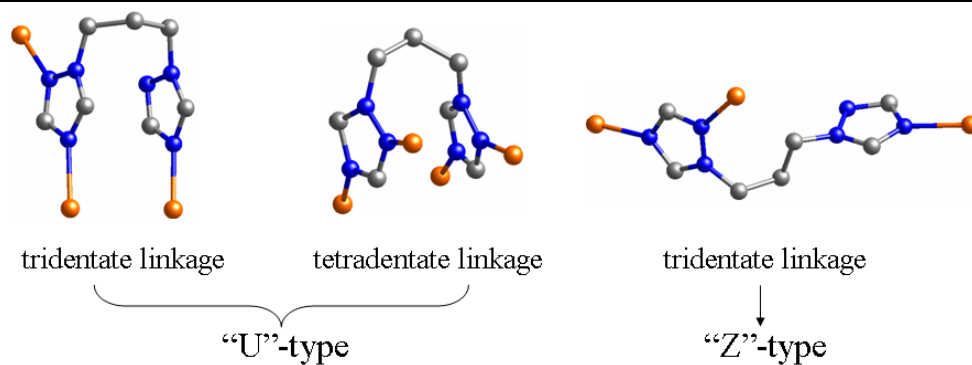

**Figure S5.** The conformations and coordination modes of btp in compound **2**.

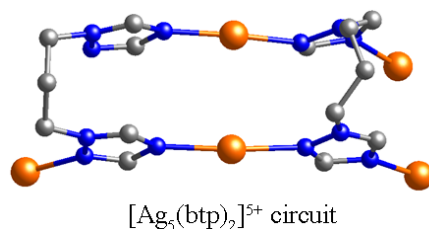

**Figure S6.** The  $[\text{Ag}_5(\text{btp})_2]^{5+}$  circuit in compound **2**.

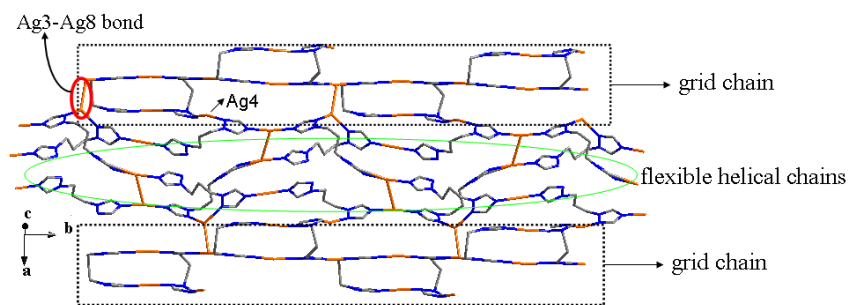

**Figure S7.** Detailed instructions for the 2D Ag/btp layer in **2**.

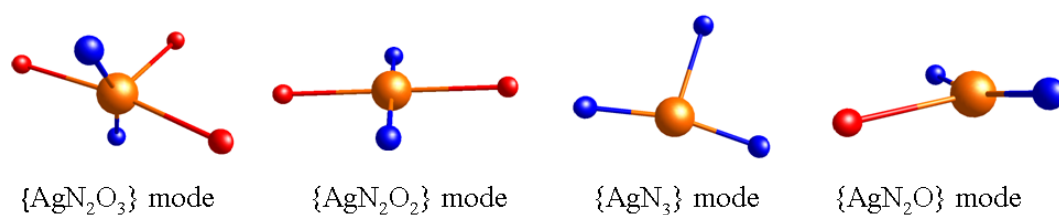

**Figure S8.** Four coordination modes of  $\text{Ag}^{\text{I}}$  ions in compound **3**.

Supplementary Material (ESI) for Dalton Transactions  
This journal is © The Royal Society of Chemistry

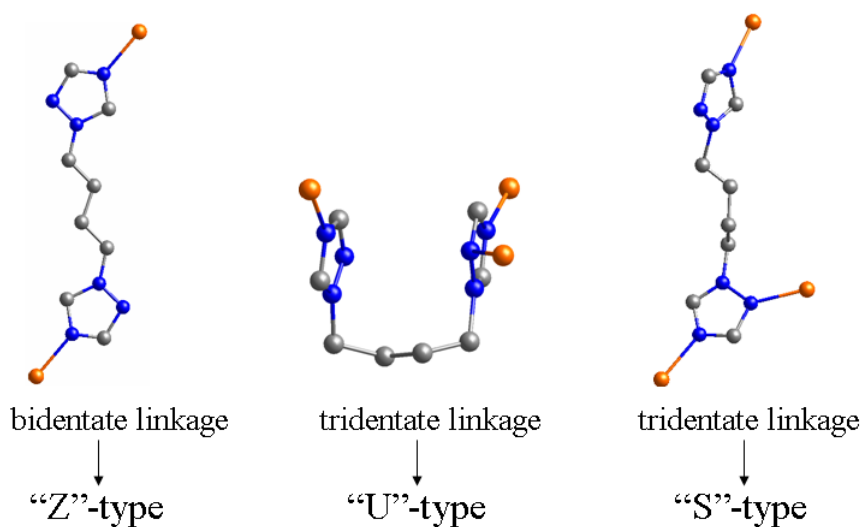

Figure S9. The conformations and coordination modes of btb in compound 3.

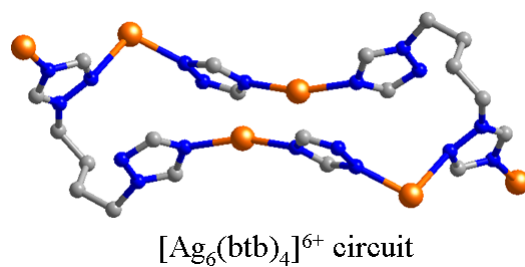

Figure S10. The  $[Ag_6(btb)_4]^{6+}$  circuit in compound 3.

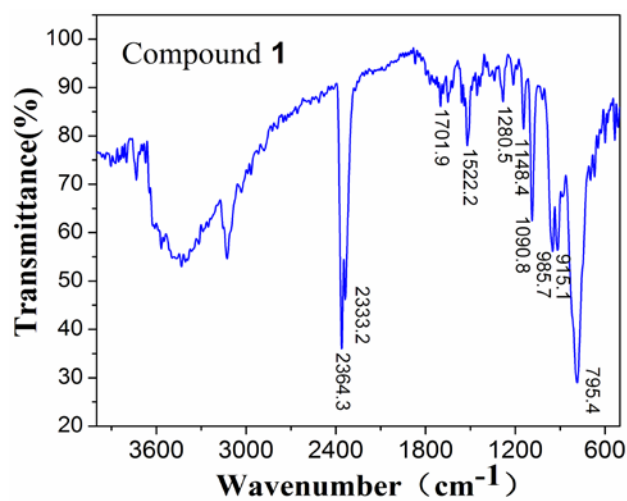

Supplementary Material (ESI) for Dalton Transactions  
This journal is © The Royal Society of Chemistry

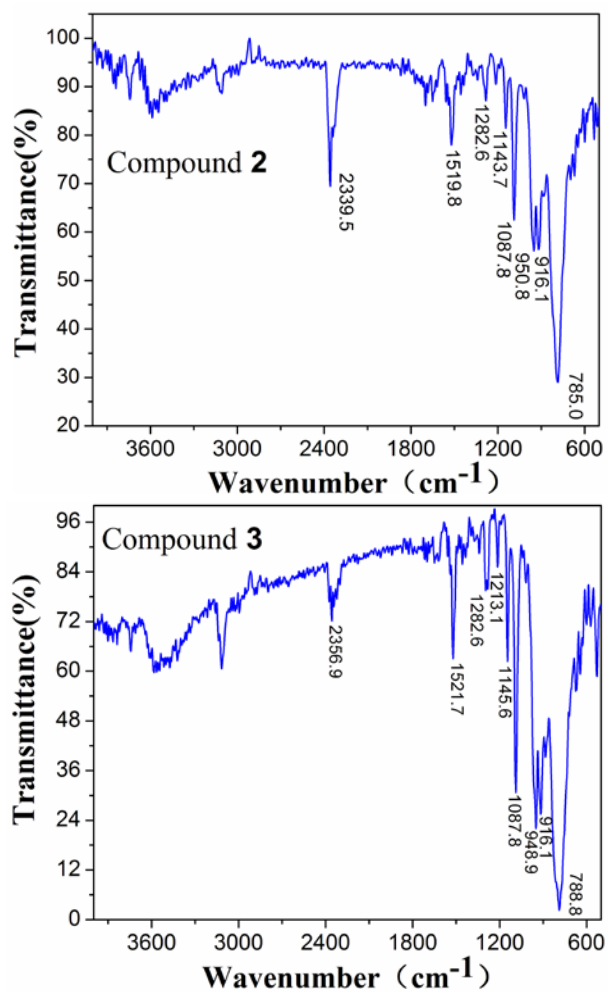

Figure S11. The IR spectra of compounds 1–3.

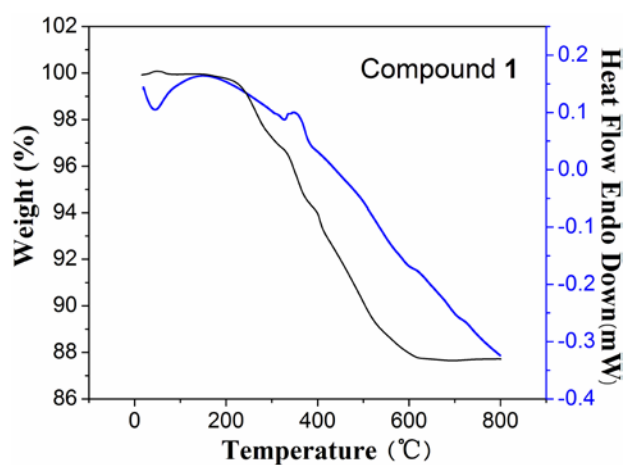

Supplementary Material (ESI) for Dalton Transactions  
This journal is © The Royal Society of Chemistry

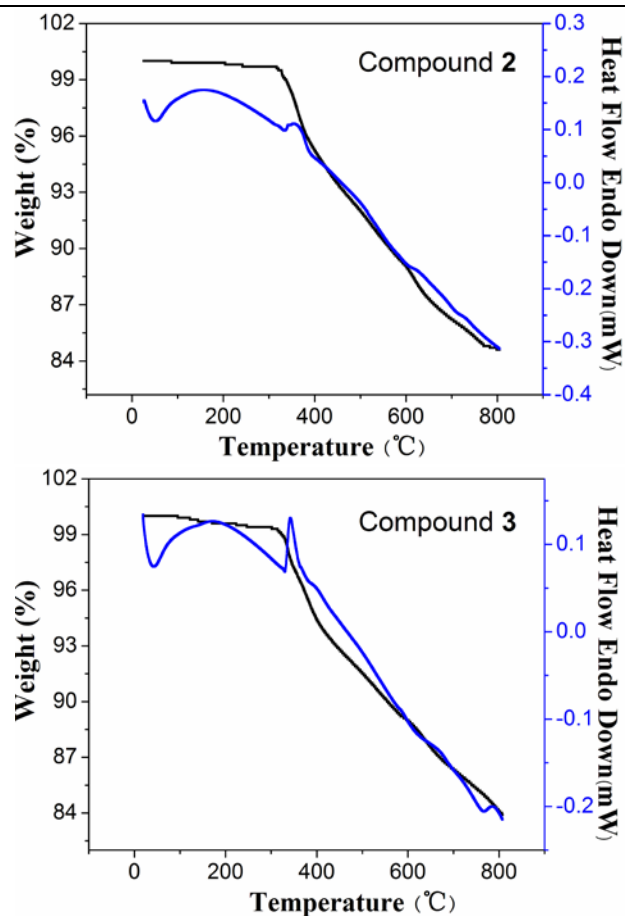

Figure S12. The TG (black) and DTA (blue) curves of compounds 1–3.

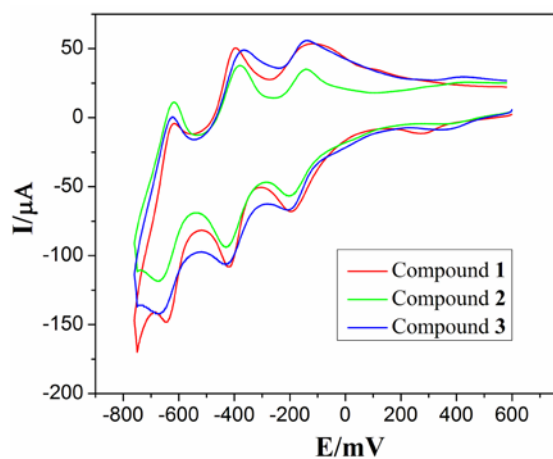

Figure S13. The cyclic voltammograms of the 1–, 2– and 3–CPEs in 0.1M  $\text{H}_2\text{SO}_4$  + 0.5M  $\text{Na}_2\text{SO}_4$  aqueous solution at scan rate of  $160 \text{ mV}\cdot\text{s}^{-1}$ .

Supplementary Material (ESI) for Dalton Transactions  
This journal is © The Royal Society of Chemistry

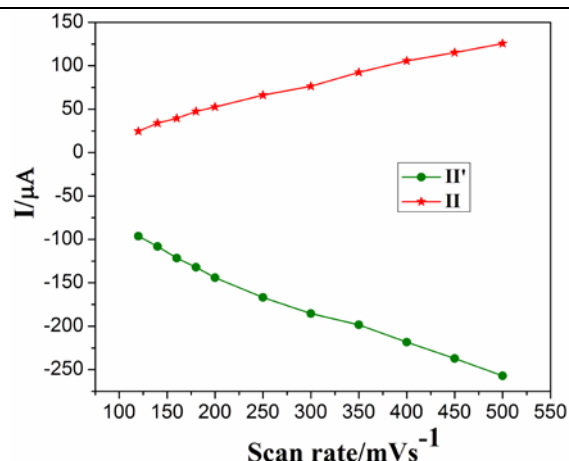

**Figure S14.** The dependence of cathodic peak (II) and anodic peak (II') currents of 2-CPE on scan rates.

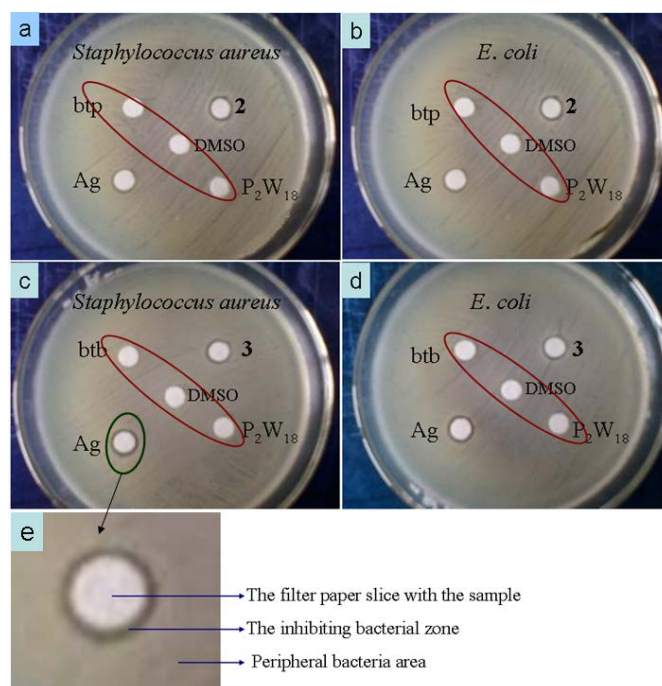

**Figure S15.** Optical photographs of antibacterial tests of compounds **2** and **3**, organic ligand btp and btb, materials dimethyl sulfoxide (DMSO), AgNO<sub>3</sub> (Ag) and *a*-K<sub>6</sub>P<sub>2</sub>W<sub>18</sub>O<sub>62</sub>·15H<sub>2</sub>O (P<sub>2</sub>W<sub>18</sub>) against *Staphylococcus aureus* (a, c) and *E. coli* (b, d). (e) Detailed instructions for the antibacterial area.

**Supplementary Material (ESI) for Dalton Transactions**  
**This journal is © The Royal Society of Chemistry**

Table S1. Selected bond lengths (Å) and bond angles (°) for compounds **1–3**.

| Compound <b>1</b> |           |                   |           |
|-------------------|-----------|-------------------|-----------|
| O(53)-Ag(1)       | 2.595(2)  | O(57)-Ag(1)       | 2.569(2)  |
| O(50)-Ag(1)       | 2.867(3)  | N(7)-Ag(1)        | 2.27(3)   |
| N(1)-Ag(1)        | 2.225(17) | O(56)-Ag(2)       | 2.835(3)  |
| N(17)-Ag(2)       | 2.16(18)  | N(3)-Ag(2)        | 2.063(18) |
| O(49)-Ag(3)       | 2.849(2)  | O(1W)-Ag(3)       | 2.581(3)  |
| N(11)-Ag(3)       | 2.191(18) | N(12)-Ag(3)       | 2.173(17) |
| O(46)-Ag(4)       | 2.779(2)  | N(22)-Ag(4)       | 2.22(4)   |
| N(18)-Ag(4)       | 2.377(18) | N(13)-Ag(4)       | 2.157(17) |
| O(45)-Ag(5)       | 2.755(3)  | O(56)-Ag(5)       | 2.815(2)  |
| O(63)-Ag(5)       | 2.762(3)  | N(20)-Ag(5)       | 2.073(18) |
| O(45)-Ag(6)       | 2.725(3)  | O(63)-Ag(6)       | 2.70(3)   |
| N(5)-N(6)         | 1.43(5)   | N(24)-Ag(6)       | 2.146(18) |
| O(48)-Ag(7)       | 2.262(3)  | O(60)-Ag(7)       | 2.11(3)   |
| N(8)-Ag(7)        | 2.13(4)   | Ag(7)-Ag(2)       | 3.064(10) |
| C(2)-N(1)-Ag(1)   | 127.1(13) | N(2)-N(1)-Ag(1)   | 124.6(13) |
| C(8)-N(7)-Ag(1)   | 124(3)    | C(7)-N(7)-Ag(1)   | 125(3)    |
| N(1)-Ag(1)-N(7)   | 171.3(11) | N(1)-Ag(1)-O(53)  | 94.0(8)   |
| N(7)-Ag(1)-O(53)  | 79.5(10)  | C(2)-N(3)-Ag(2)   | 127.6(14) |
| C(1)-N(3)-Ag(2)   | 124.4(14) | N(11)-Ag(3)-O(1W) | 101.9(9)  |
| N(12)-Ag(3)-O(1W) | 93.3(9)   | N(10)-N(11)-Ag(3) | 133.5(13) |
| C(23)-N(11)-Ag(3) | 117.6(13) | C(12)-N(12)-Ag(3) | 123.8(14) |
| C(11)-N(12)-Ag(3) | 126.7(14) | N(12)-Ag(3)-N(11) | 140.8(10) |
| C(18)-N(18)-Ag(4) | 129.5(13) | N(19)-N(18)-Ag(4) | 122.5(13) |
| N(14)-N(13)-Ag(4) | 123.2(14) | C(11)-N(13)-Ag(4) | 128.4(14) |
| C(21)-N(22)-Ag(4) | 135(3)    | N(21)-N(22)-Ag(4) | 122(3)    |
| N(13)-Ag(4)-N(22) | 143.1(12) | N(13)-Ag(4)-N(18) | 112.9(9)  |
| N(22)-Ag(4)-N(18) | 102.9(11) | C(18)-N(20)-Ag(5) | 125.0(14) |
| C(17)-N(20)-Ag(5) | 126.9(14) | C(23)-N(24)-Ag(6) | 135.8(14) |
| C(24)-N(24)-Ag(6) | 115.7(14) | C(23)-N(24)-Ag(6) | 135.8(14) |
| C(24)-N(24)-Ag(6) | 115.7(14) | O(60)-Ag(7)-W(4)  | 25.3(7)   |
| O(60)-W(4)-Ag(7)  | 31.3(8)   | O(29)-W(4)-Ag(7)  | 101.6(8)  |



**Supplementary Material (ESI) for Dalton Transactions**  
**This journal is © The Royal Society of Chemistry**

---

|                   |            |                   |           |
|-------------------|------------|-------------------|-----------|
| O(17)-W(4)-Ag(7)  | 133.4(7)   | O(58)-W(4)-Ag(7)  | 66.6(7)   |
| O(5)-W(4)-Ag(7)   | 92.7(7)    | O(6)-W(4)-Ag(7)   | 140.6(6)  |
| Compound 2        |            |                   |           |
| Ag(1)-O(14)       | 2.570(10)  | Ag(1)-O(36)       | 2.694(9)  |
| Ag(1)-N(4)        | 2.173(15)  | Ag(1)-N(9)        | 2.212(16) |
| Ag(2)-O(22)       | 2.683(10)  | Ag(2)-O(18)       | 2.790(9)  |
| Ag(2)-N(1)        | 2.088(16)  | Ag(2)-N(10)       | 2.139(16) |
| Ag(3)-N(5)        | 2.230(17)  | Ag(3)-N(7)        | 2.14(2)   |
| Ag(3)-Ag(8)       | 2.42(2)    | Ag(4)-O(40)       | 2.415(12) |
| Ag(4)-N(12)       | 2.32(2)    | Ag(4)-N(20)       | 2.265(18) |
| Ag(4)-O(32)       | 2.786(13)  | Ag(5)-N(13)       | 2.158(15) |
| Ag(5)-O(11)       | 2.632(3)   | Ag(5)-Ag(6)       | 3.082(2)  |
| Ag(5)-N(30)       | 2.15(2)    | Ag(6)-N(18)       | 2.192(15) |
| Ag(6)-O(36)       | 2.605(13)  | Ag(6)-O(14)       | 2.745(9)  |
| Ag(6)-N(19)       | 2.150(15)  | Ag(7)-N(24)       | 2.132(16) |
| Ag(7)-N(25)       | 2.129(17)  | Ag(7)-O(17)       | 2.741(9)  |
| Ag(8)-N(26)       | 2.343(16)  | Ag(8)-O(29)       | 2.380(12) |
| Ag(8)-N(17)       | 2.803(9)   | Ag(8)-O(55)       | 2.562(15) |
| N(4)-Ag(1)-N(9)   | 168.7(6)   | N(9)-Ag(1)-O(14)  | 94.0(4)   |
| N(1)-Ag(2)-N(10)  | 164.8(7)   | N(7)-Ag(3)-N5     | 152.1(12) |
| N(12)-Ag(4)-O(40) | 85.8(6)    | N(13)-Ag(5)-N(30) | 169.8(7)  |
| N(19)-Ag(6)-N(18) | 169.1(6)   | N(19)-Ag(6)-O(36) | 86.8(5)   |
| N(25)-Ag(7)-N(24) | 179.8(6)   | N(26)-Ag(8)-O(55) | 97.6(5)   |
| Compound 3        |            |                   |           |
| Ag(1)-N(12)       | 2.09(2)    | Ag(1)-O(9)        | 2.446(14) |
| Ag(2)-O(47)       | 2.79(7)    | Ag(2)-N(1)        | 2.08(2)   |
| Ag(3)-O(35)       | 2.718(7)   | Ag(3)-N(15)       | 2.07(2)   |
| Ag(3)-N(19)       | 2.12(2)    | Ag(4)-N(5)        | 2.142(18) |
| Ag(4)-N(11)       | 2.516(18)  | Ag(4)-N(18)       | 2.156(19) |
| Ag(5)-O(28)       | 2.886(7)   | Ag(5)-N(4)        | 2.178(18) |
| Ag(5)-N(7)        | 2.181(19)  | Ag(5)-O(22)       | 2.613(7)  |
| Ag(5)-O(22)       | 2.736(11)  | N(12)-Ag(1)-O(9)  | 88.6(6)   |
| C(15)-N(12)-Ag(1) | 128.0(17)  | C(16)-N(12)-Ag(1) | 133.2(18) |
| N(1)-Ag(2)-N(1)   | 179.998(4) | C(2)-N(1)-Ag(2)   | 130.5(19) |

---

**Supplementary Material (ESI) for Dalton Transactions**  
**This journal is © The Royal Society of Chemistry**

---

|                   |           |                   |           |
|-------------------|-----------|-------------------|-----------|
| C(1)-N(1)-Ag(2)   | 128(2)    | N(15)-Ag(3)-N(19) | 164.4(11) |
| C(18)-N(15)-Ag(3) | 130(2)    | C(17)-N(15)-Ag(3) | 123.5(17) |
| C(26)-N(19)-Ag(3) | 123.6(19) | C(25)-N(19)-Ag(3) | 130(2)    |
| N(5)-Ag(4)-N(18)  | 161.2(7)  | C(23)-N(18)-Ag(4) | 125.8(16) |
| C(24)-N(18)-Ag(4) | 130.5(16) | C(7)-N(5)-Ag(4)   | 129.5(15) |
| N(6)-N(5)-Ag(4)   | 129.3(14) | N(4)-Ag(5)-N(7)   | 160.9(8)  |
| C(8)-N(4)-Ag(5)   | 127.7(15) | C(7)-N(4)-Ag(5)   | 125.6(17) |
| C(9)-N(7)-Ag(5)   | 124.2(17) | C(10)-N(7)-Ag(5)  | 124.9(15) |

---
